# Supplementary material
Source: publisher figshare collection journal article supplement (https://karger.figshare.com/ndownloader/files/15202997)
Supplement: Supplementary file 1 [file 15202997]

## **Outcomes of Desidustat Treatment in people with Anemia and Chronic Kidney Disease: A Phase 2 Study**

### **Table of Contents for Supplemental Material**

Supplemental Table 1: Inclusion and exclusion criteria

Supplemental Table 2: List of reagents/methods used other than Desidustat or its metabolites

Supplemental Table 3: Definition of populations

Supplemental Table 4: Proportion of responders at end-of-treatment (week 6)

Supplemental Table 5: Change from baseline to week 6 in mean efficacy assessments - mITT population

Supplemental Table 6: Change from baseline to week 6 in mean efficacy assessments - PP population

Supplemental Table 7: Pharmacokinetic parameters after first and last dose

Supplemental Table 8: Potassium (mmol/L) levels during treatment duration

Supplemental Figure 1: Patient disposition

Supplemental Figure 2: Change in hemoglobin at week 6

Supplemental Figure 3: Change in concentration of TIBC, LDL, Hepcidin

Supplemental Figure 4: Erythropoietin levels on first and last day of treatment

Supplemental Figure 5: Trend of TIBC ( $\mu\text{g/dL}$ ) and Hepcidin ( $\text{ng/mL}$ ) during treatment duration

**Outcomes of Desidustat Treatment in people with Anemia and Chronic Kidney Disease:  
A Phase 2 Study**

**Supplemental Table 1: Inclusion and exclusion criteria**

|                                   |                                                                                                                                                                                                                                                                                                                                                                                                                                                                                                                                                                                                                                                                                                                                                                                                                                                                                                                                                                                                                                                                                                                                                                                                                                                                                                                                                                                                                                                              |
|-----------------------------------|--------------------------------------------------------------------------------------------------------------------------------------------------------------------------------------------------------------------------------------------------------------------------------------------------------------------------------------------------------------------------------------------------------------------------------------------------------------------------------------------------------------------------------------------------------------------------------------------------------------------------------------------------------------------------------------------------------------------------------------------------------------------------------------------------------------------------------------------------------------------------------------------------------------------------------------------------------------------------------------------------------------------------------------------------------------------------------------------------------------------------------------------------------------------------------------------------------------------------------------------------------------------------------------------------------------------------------------------------------------------------------------------------------------------------------------------------------------|
| <p><b>Inclusion Criteria:</b></p> | <ol style="list-style-type: none"> <li>1. Male or female patient <math>\geq 18</math> to <math>\leq 65</math> years of age with anemia of CKD stage I – IV</li> <li>2. Men who agreed to use adequate contraception when sexually active or women without childbearing potential.</li> <li>3. Estimated GFR <math>\geq 15</math> mL/min/1.73 m<sup>2</sup></li> <li>4. Patients had not on dialysis and had not expected to begin dialysis during the treatment period of the study</li> <li>5. Screening Hb concentration <math>\geq 6.5</math>g/dL to <math>\leq 11</math> g/dL (Mean value if two times Hb evaluation for enrollment)</li> <li>6. No iron, folate or Vitamin B12 deficiency. (Serum ferritin levels <math>\geq 100</math> <math>\mu</math>g/L and <math>&lt; 1000</math> <math>\mu</math>g/L or transferrin saturation <math>\geq 20\%</math>)</li> <li>7. Body weight <math>\geq 45</math> kg</li> <li>8. Given written informed consent, which included compliance with protocol</li> </ol>                                                                                                                                                                                                                                                                                                                                                                                                                                             |
| <p><b>Exclusion Criteria</b></p>  | <ol style="list-style-type: none"> <li>1. Any erythropoietin treatment within 4 weeks prior to participating in the study</li> <li>2. Intravenous iron within 10 days prior to participating in the study</li> <li>3. Red blood cell transfusion within 8 weeks prior to participating in the study</li> <li>4. History of previous or concurrent cancer</li> <li>5. Currently active clinically significant cardiovascular disease such as uncontrolled arrhythmia, congestive heart failure, any class 3 or 4 cardiac disease as defined by the New York Heart Association Functional Classification or history of myocardial infarction prior to first dose with study drug</li> <li>6. Serologic status reflected active hepatitis B or C infection or HIV infection</li> <li>7. Active infection at initiation of study</li> <li>8. History of renal transplant</li> <li>9. Major surgery within 90 days of the first day of study drug dosing, and minor surgery within 30 days of the first day of study drug dosing</li> <li>10. Unable to swallow tablets or disease significantly affected gastrointestinal function and/or inhibited small intestine absorption such as; mal-absorption syndrome, resection of the small bowel or poorly controlled inflammatory bowel disease affected the small intestine</li> <li>11. History of uncontrolled autoimmune hemolytic anemia, idiopathic thrombocytopenic purpura (ITP) or thalassemia</li> </ol> |

**Outcomes of Desidustat Treatment in people with Anemia and Chronic Kidney Disease:  
A Phase 2 Study**

|  |                                                                                                                                                                                                                                                                                                                                                                                                                                                                                                                                                                                                                                                                                                                                                                                                                                                                                                                                                                                                                                                                                                                                                                                                                                                                                                                                                                                                                                                                                                                                                                                                                                                                                                                                                                                                                                                                                                                                                                                                                                                                                                                                                                                                                                                         |
|--|---------------------------------------------------------------------------------------------------------------------------------------------------------------------------------------------------------------------------------------------------------------------------------------------------------------------------------------------------------------------------------------------------------------------------------------------------------------------------------------------------------------------------------------------------------------------------------------------------------------------------------------------------------------------------------------------------------------------------------------------------------------------------------------------------------------------------------------------------------------------------------------------------------------------------------------------------------------------------------------------------------------------------------------------------------------------------------------------------------------------------------------------------------------------------------------------------------------------------------------------------------------------------------------------------------------------------------------------------------------------------------------------------------------------------------------------------------------------------------------------------------------------------------------------------------------------------------------------------------------------------------------------------------------------------------------------------------------------------------------------------------------------------------------------------------------------------------------------------------------------------------------------------------------------------------------------------------------------------------------------------------------------------------------------------------------------------------------------------------------------------------------------------------------------------------------------------------------------------------------------------------|
|  | <ol style="list-style-type: none"><li>12. Presence or a history of bleeding disorders or clinical conditions (e.g. gastrointestinal bleeding or constitutional disorders) that might increase risk of life-threatening bleeding</li><li>13. History of stroke or intracranial hemorrhage within 6 months prior to enrollment</li><li>14. History of allergic reactions attributed to compounds of similar chemical or biologic composition to ZYAN1 or to any erythropoiesis-stimulating agent</li><li>15. Required or was receiving anticoagulation with warfarin or equivalent vitamin K antagonists or other medications within 28 days of the first dose of study drug that in the investigator's opinion, could compromise patient safety</li><li>16. Pregnant and breastfeeding women</li><li>17. Current life-threatening illness, medical condition or organ system dysfunction which, in the Investigator's opinion, could compromise the patient's safety</li><li>18. Abnormal baseline laboratory investigations as follows:<ul style="list-style-type: none"><li>• WBC count <math>\leq 4 \times 10^3/\mu\text{L}</math></li><li>• Platelets count <math>\leq 100 \times 10^3/\mu\text{L}</math></li><li>• Bilirubin <math>\geq 1.5 \text{ mg/dL}</math></li><li>• ALT and/or AST <math>\geq 2.5</math> times of the ULN</li></ul></li><li>19. Other laboratory abnormalities that, in the opinion of the investigator, would be compromised the patient's safety or interfere with data interpretation</li><li>20. Presence of other systemic disorders or diseases (e.g., respiratory, gastrointestinal, endocrine, immunological, dermatological, neurological, psychiatric disease or any other body system involvement) which, in the Investigator's opinion, could be compromised the patient's safety</li><li>21. History of significant alcoholism or drug abuse within the past 1 year. History or presence of significant smoking (more than 10 cigarettes per day) or consumption of tobacco/nicotine products (more than 10 times per day)</li><li>22. History of difficulty with donating blood</li><li>23. History or presence of any clinically significant electrocardiogram (ECG) abnormalities during screening</li></ol> |
|--|---------------------------------------------------------------------------------------------------------------------------------------------------------------------------------------------------------------------------------------------------------------------------------------------------------------------------------------------------------------------------------------------------------------------------------------------------------------------------------------------------------------------------------------------------------------------------------------------------------------------------------------------------------------------------------------------------------------------------------------------------------------------------------------------------------------------------------------------------------------------------------------------------------------------------------------------------------------------------------------------------------------------------------------------------------------------------------------------------------------------------------------------------------------------------------------------------------------------------------------------------------------------------------------------------------------------------------------------------------------------------------------------------------------------------------------------------------------------------------------------------------------------------------------------------------------------------------------------------------------------------------------------------------------------------------------------------------------------------------------------------------------------------------------------------------------------------------------------------------------------------------------------------------------------------------------------------------------------------------------------------------------------------------------------------------------------------------------------------------------------------------------------------------------------------------------------------------------------------------------------------------|

## Outcomes of Desidustat Treatment in people with Anemia and Chronic Kidney Disease:

### A Phase 2 Study

|  |                                                                                                                                                                                                                                                                                                                                                                                                                                                                                                                                                                                                                                                                                                                                                                                                                                                                                                                                                                                                                                                                                                                                                                                                                                                                                                                                                                                                                                                                                                                         |
|--|-------------------------------------------------------------------------------------------------------------------------------------------------------------------------------------------------------------------------------------------------------------------------------------------------------------------------------------------------------------------------------------------------------------------------------------------------------------------------------------------------------------------------------------------------------------------------------------------------------------------------------------------------------------------------------------------------------------------------------------------------------------------------------------------------------------------------------------------------------------------------------------------------------------------------------------------------------------------------------------------------------------------------------------------------------------------------------------------------------------------------------------------------------------------------------------------------------------------------------------------------------------------------------------------------------------------------------------------------------------------------------------------------------------------------------------------------------------------------------------------------------------------------|
|  | <p>24. Participants who had participated in any drug research study other than the present trial within past 3 months</p> <p>25. Participants who had donated one unit (350 ml) of blood in the past 3 months or history of whole blood transfusion in last 120 days prior to entry in the study</p> <p>26. Type I DM</p> <p>27. History of chronic inflammatory disease (RA, Celiac disease, UC, crohns disease, SLE)</p> <p>28. In case of Type II DM patients, HbA1c &gt;7.5 gm% and patients was stabilized on anti-hyperglycemic drugs (except Insulin) less than 03 months</p> <p>29. In case of hypertensive patients, systolic and diastolic BP were greater than 140 and 90 mm of hg respectively and patients was stabilized on antihypertensive drugs less than 03 months</p> <p>30. Female volunteers with following criteria were to be recruited:</p> <ul style="list-style-type: none"><li>• History of pregnancy or lactation in the past 3 months</li><li>• Fertile female volunteers not protected against pregnancy by adequate long-term anti-fertility measures</li><li>• History of less than 1 year of menopause and not used adequate long-term anti-fertility measures</li><li>• Used hormone replacement therapy</li><li>• Unable to give assurance for protection against pregnancy for 3 months after the participation in this trial</li><li>• Positive urine pregnancy test on the day of check-in</li><li>• Positive serum <math>\beta</math>-hCG level at the screening visit</li></ul> |
|--|-------------------------------------------------------------------------------------------------------------------------------------------------------------------------------------------------------------------------------------------------------------------------------------------------------------------------------------------------------------------------------------------------------------------------------------------------------------------------------------------------------------------------------------------------------------------------------------------------------------------------------------------------------------------------------------------------------------------------------------------------------------------------------------------------------------------------------------------------------------------------------------------------------------------------------------------------------------------------------------------------------------------------------------------------------------------------------------------------------------------------------------------------------------------------------------------------------------------------------------------------------------------------------------------------------------------------------------------------------------------------------------------------------------------------------------------------------------------------------------------------------------------------|

**Outcomes of Desidustat Treatment in people with Anemia and Chronic Kidney Disease:  
A Phase 2 Study**

**Supplemental Table 2: List of reagents/methods used other than Desidustat or its metabolites**

| Section                               | Parameter                                                                     | Reagents/Methods                                             | Instrument                                                  |
|---------------------------------------|-------------------------------------------------------------------------------|--------------------------------------------------------------|-------------------------------------------------------------|
| <b>Hematology</b>                     | Complete Blood Count                                                          | Fully Automated 5 part Differentiation                       | Fully Automated Hematology Analyzer Advia 2120 from Siemens |
|                                       | Retic Count                                                                   | Laser optical, Oxazine staining                              |                                                             |
|                                       | Blood Group                                                                   | Tube agglutination                                           | Not Applicable                                              |
|                                       | ESR                                                                           | Westergreen                                                  | Westergreen                                                 |
| <b>Biochemistry /<br/>Immunoassay</b> | HbA1c                                                                         | Tina-Quant                                                   | Cobas 6000 from Roche Diagnostics                           |
|                                       | AST                                                                           | IFCC without pyridoxal phosphate activation                  | Cobas 6000 from Roche Diagnostics                           |
|                                       | ALT                                                                           | IFCC without pyridoxal phosphate activation                  | Cobas 6000 from Roche Diagnostics                           |
|                                       | ALP                                                                           | IFCC- p-nitrophenyl phosphate                                | Cobas 6000 from Roche Diagnostics                           |
|                                       | Total Bilirubin                                                               | Colorimetric - 3,5 dichlorophenyl diazonium                  | Cobas 6000 from Roche Diagnostics                           |
|                                       | Total Protein                                                                 | Biuret-colorimetric                                          | Cobas 6000 from Roche Diagnostics                           |
|                                       | Albumin                                                                       | Bromcresol green -Colorimetric                               | Cobas 6000 from Roche Diagnostics                           |
|                                       | Globulin                                                                      | Calculated from total protein and albumin                    | Cobas 6000 from Roche Diagnostics                           |
|                                       | GGT                                                                           | Enzymatic Colorimetric                                       | Cobas 6000 from Roche Diagnostics                           |
|                                       | Amylase                                                                       | IFCC G7 p-nitrophenol                                        | Cobas 6000 from Roche Diagnostics                           |
|                                       | Lipase                                                                        | Enzymatic-Colorimetric                                       | Cobas 6000 from Roche Diagnostics                           |
|                                       | Urea                                                                          | Urease,Kinetic                                               | Cobas 6000 from Roche Diagnostics                           |
|                                       | Creatinine                                                                    | Jaffe, Kinetic                                               | Cobas 6000 from Roche Diagnostics                           |
|                                       | Electrolytes                                                                  | ion-selective electrodes -Indirect                           | Cobas 6000 from Roche Diagnostics                           |
|                                       | Total Cholesterol                                                             | Cholesterol Esterase Oxidase Enzymatic-Colorimetric Assay    | Cobas 6000 from Roche Diagnostics                           |
|                                       | Triglyceride                                                                  | Glycerol phosphate oxidase Enzymatic-Colorimetric Assay      | Cobas 6000 from Roche Diagnostics                           |
|                                       | HDL-C                                                                         | Cholesterol oxidase, Peroxidase Enzymatic colorimetric Assay | Cobas 6000 from Roche Diagnostics                           |
|                                       | LDL-C                                                                         | Cholesterol oxidase, Peroxidase Enzymatic colorimetric Assay | Cobas 6000 from Roche Diagnostics                           |
|                                       | CRP                                                                           | Particle Enhanced Immuno-Turbidimetric Assay                 | Cobas 6000 from Roche Diagnostics                           |
|                                       | Iron                                                                          | FerroZine method without deproteinization Colorimetric assay | Cobas 6000 from Roche Diagnostics                           |
| TIBC                                  | Calculated                                                                    | --                                                           |                                                             |
| Ferritin                              | Electrochemiluminescence immunoassay based on the principle of Sandwich Assay | Cobas 6000 from Roche Diagnostics                            |                                                             |
| Transferrin Saturation                | Calculated                                                                    | --                                                           |                                                             |

## Outcomes of Desidustat Treatment in people with Anemia and Chronic Kidney Disease:

### A Phase 2 Study

|                   |                  |                                                                                                                                                      |                                                             |
|-------------------|------------------|------------------------------------------------------------------------------------------------------------------------------------------------------|-------------------------------------------------------------|
|                   | RBS              | Hexokinase                                                                                                                                           | Cobas 6000 from Roche Diagnostics                           |
|                   | Hepcidin         | Hepcidin 25 (bioactive) HS ELISA Kit from DRG Inc. is a solid Phase enzyme-linked immunosorbent assay based on the principle of competitive binding. | Fully Automated ELISA system, EVOLIS TWIN PLUS from Bio-Rad |
|                   | Vitamin B12      | Electrochemiluminescence immunoassay based on the principle of Competition Assay                                                                     | Cobas 6000 from Roche Diagnostics                           |
|                   | Folic Acid       | Electrochemiluminescence immunoassay based on the principle of Competition Assay                                                                     |                                                             |
|                   | β-hcg            | Electrochemiluminescence immunoassay based on the principle of Sandwich Assay                                                                        |                                                             |
|                   | EPO              | Immulate 1000 EPO is a solid-phase, enzyme-labeled chemiluminescence immunometric assay on the principle of Sandwich Assay                           | Immulate 1000 from Siemens                                  |
|                   | eGFR             | Calculated                                                                                                                                           | --                                                          |
|                   | HIV              | Electrochemiluminescence immunoassay based on the principle of Sandwich Assay                                                                        | Cobas 6000 from Roche Diagnostics                           |
|                   | HbsAg            | Electrochemiluminescence immunoassay based on the principle of Sandwich Assay                                                                        |                                                             |
|                   | HCV              | Electrochemiluminescence immunoassay based on the principle of Sandwich Assay                                                                        |                                                             |
|                   | Microalbumin     | Calculated from Urine Alb. and Urine Creatinine                                                                                                      | Cobas 6000 from Roche Diagnostics                           |
| <b>Urinalysis</b> | pH               | This test is based on pH indicator method.                                                                                                           | Cobas u411 from Roche Diagnostics                           |
|                   | Protein          | The test is based on the principle of the protein error of a pH indicator.                                                                           |                                                             |
|                   | Bilirubin        | The test is based on the coupling of bilirubin with a diazonium salt.                                                                                |                                                             |
|                   | Ketones          | This test is based on the principle of Legal's test.                                                                                                 |                                                             |
|                   | Specific Gravity | This test is based on ion concentration detection of the urine.                                                                                      |                                                             |
|                   | Glucose          | The glucose determination is based on the specific glucose-oxidase/peroxidase reaction (GOD/POD method).                                             |                                                             |
|                   | Erythrocyte      | Peroxidase method.                                                                                                                                   |                                                             |
|                   | Urobilinogen     | Diazonium salt method.                                                                                                                               |                                                             |
|                   | Nitrite          | The test is based on the principle of the Griess test.                                                                                               |                                                             |
|                   | Leukocyte        | Leukocyte esterase method.                                                                                                                           |                                                             |
|                   | Red Blood Cells  | Microscopic Method                                                                                                                                   | --                                                          |
|                   | Pus Cells        |                                                                                                                                                      |                                                             |
|                   | Epithelial Cells |                                                                                                                                                      |                                                             |
| Others            |                  |                                                                                                                                                      |                                                             |

## Outcomes of Desidustat Treatment in people with Anemia and Chronic Kidney Disease:

### A Phase 2 Study

**Supplemental Table 3: Definition of populations**

| <b>Population</b>        | <b>Definition</b>                                                                                                                                                                                                  |
|--------------------------|--------------------------------------------------------------------------------------------------------------------------------------------------------------------------------------------------------------------|
| Safety                   | All randomised patients who received at least one dose of the study medication.                                                                                                                                    |
| Modified intent-to-treat | All randomized patients who received at least one dose of trial medication and had at least one post-baseline measurement. The missing post-baseline data were imputed using the last observation carried forward. |
| Per-protocol             | All patients in the mITT population who met the eligibility criteria, completed the study in compliance with the protocol and had no major protocol deviation.                                                     |

mITT, modified intent-to-treat; PP, per-protocol.

## Outcomes of Desidustat Treatment in people with Anemia and Chronic Kidney Disease:

### A Phase 2 Study

**Supplemental Table 4: Proportion of responders at end-of-treatment (week 6)**

| <b>Treatment</b>           | <b>mITT<br/>n (%)</b> | <b>PP<br/>n (%)</b> |
|----------------------------|-----------------------|---------------------|
| Desidustat 100 mg (N = 29) | 19 (65.52)            | 16 (61.54)          |
| Desidustat 150 mg (N = 28) | 21 (75.00)            | 20 (83.33)          |
| Desidustat 200 mg (N = 29) | 24 (82.76)            | 18 (81.82)          |
| Placebo (N = 30)           | 7 (23.33)             | 3 (11.54)           |

mITT, modified intent-to-treat; PP, per-protocol.



**Outcomes of Desidustat Treatment in people with Anemia and Chronic Kidney Disease:  
A Phase 2 Study**

**Supplemental Table 5: Change from baseline to week 6 in mean efficacy assessments - mITT population**

| <b>Safety Parameters</b> | <b>Analysis</b> | <b>Desidustat 100 mg (N=29)</b> | <b>Desidustat 150 mg (N=28)</b> | <b>Desidustat 200 mg (N=29)</b> | <b>Placebo (N=30)</b> |
|--------------------------|-----------------|---------------------------------|---------------------------------|---------------------------------|-----------------------|
| Iron (µg/dL)             | Baseline        | 61.90 ± 26.90                   | 60.17 ± 40.73                   | 59.87 ± 27.23                   | 70.36 ± 29.86         |
|                          | Change          | 5.63 ± 28.13                    | -0.20 ± 31.98                   | 0.28 ± 60.86                    | 4.34 ± 25.61          |
| TIBC (µg/dL)             | Baseline        | 274.54 ± 74.68                  | 267.29 ± 69.34                  | 291.56 ± 75.90                  | 256.74 ± 63.61        |
|                          | Change          | 30.30 ± 74.52                   | 53.93 ± 68.85                   | 70.60 ± 78.03                   | -5.47 ± 54.07         |
| Transferrin (%)          | Baseline        | 25.07 ± 13.78                   | 24.75 ± 20.06                   | 22.34 ± 12.44                   | 28.87 ± 12.32         |
|                          | Change          | -0.93 ± 11.10                   | -4.78 ± 14.52                   | -5.67 ± 19.00                   | 2.17 ± 10.99          |
| CRP (mg/dL)              | Baseline        | 0.54 ± 0.80                     | 1.51 ± 2.35                     | 0.91 ± 1.97                     | 0.56 ± 0.72           |
|                          | Change          | 0.06 ± 0.75                     | -0.69 ± 2.13                    | 0.22 ± 0.91                     | -0.22 ± 0.85          |
| LDL (mg/dL)              | Baseline        | 105.72 ± 39.41                  | 91.10 ± 43.34                   | 89.66 ± 32.20                   | 96.00 ± 42.93         |
|                          | Change          | -18.46 ± 32.53                  | -18.15 ± 29.52                  | -26.74 ± 20.81                  | -1.17 ± 25.87         |
| TG (mg/dL)               | Baseline        | 164.79 ± 97.14                  | 134.40 ± 57.66                  | 198.49 ± 120.50                 | 142.94 ± 68.75        |
|                          | Change          | -23.63 ± 76.14                  | 29.29 ± 62.59                   | -6.51 ± 131.65                  | 15.04 ± 67.53         |
| EPO (mg/dL)              | Baseline        | 13.47 ± 9.08                    | 12.62 ± 7.51                    | 10.97 ± 4.50                    | 13.36 ± 11.29         |
|                          | Change          | 16.57 ± 53.72                   | 28.13 ± 38.67                   | 54.50 ± 113.37                  | 0.49 ± 9.37           |
| Hepcidin (ng/dL)         | Baseline        | 86.57 ± 84.18                   | 124.79 ± 113.64                 | 80.78 ± 87.77                   | 96.14 ± 93.30         |
|                          | Change          | -59.73 ± 78.96                  | -91.36 ± 106.86                 | -59.24 ± 94.95                  | -33.54 ± 75.38        |

CRP, C-reactive protein; EPO, erythropoietin; LDL, Low-density lipoprotein; mITT, modified intent-to-treat; n, number of patients; SD, standard deviation TIBC, total iron binding capacity; TG, triglyceride. Data are presented in mean ± SD.

**Outcomes of Desidustat Treatment in people with Anemia and Chronic Kidney Disease:  
A Phase 2 Study**

**Supplemental Table 6: Change from baseline to week 6 in mean efficacy assessments - PP population**

| <b>Safety Parameters</b> | <b>Analysis</b> | <b>Desidustat 100 mg (N=26)</b> | <b>Desidustat 150 mg (N=24)</b> | <b>Desidustat 200 mg (N=22)</b> | <b>Placebo (N=26)</b> |
|--------------------------|-----------------|---------------------------------|---------------------------------|---------------------------------|-----------------------|
| Iron (µg/dL)             | Baseline        | 59.84 ± 26.68                   | 57.95 ± 39.89                   | 64.87 ± 20.67                   | 66.40 ± 22.52         |
|                          | Change          | 5.86 ± 28.42                    | 0.57 ± 33.79                    | 3.39 ± 65.27                    | 5.24 ± 26.91          |
| TIBC (µg/dL)             | Baseline        | 281.30 ± 72.59                  | 270.65 ± 71.20                  | 287.82 ± 80.89                  | 252.33 ± 61.81        |
|                          | Change          | 31.29 ± 76.84                   | 56.61 ± 72.53                   | 85.95 ± 72.59                   | -2.31 ± 46.58         |
| Transferrin (%)          | Baseline        | 23.38 ± 12.41                   | 24.21 ± 20.99                   | 24.77 ± 11.46                   | 27.73 ± 10.47         |
|                          | Change          | -0.96 ± 11.45                   | -4.75 ± 15.29                   | -6.09 ± 20.22                   | 2.54 ± 11.35          |
| CRP (mg/dL)              | Baseline        | 0.54 ± 0.83                     | 1.62 ± 2.51                     | 0.39 ± 0.50                     | 0.61 ± 0.76           |
|                          | Change          | 0.06 ± 0.78                     | -0.89 ± 2.18                    | 0.09 ± 0.65                     | -0.23 ± 0.90          |
| LDL (mg/dL)              | Baseline        | 106.46 ± 39.46                  | 87.50 ± 42.65                   | 93.03 ± 33.54                   | 99.43 ± 41.68         |
|                          | Change          | -19.28 ± 33.72                  | -16.15 ± 23.78                  | -27.85 ± 22.02                  | -3.53 ± 23.83         |
| TG (mg/dL)               | Baseline        | 167.51 ± 101.90                 | 124.00 ± 45.97                  | 192.21 ± 128.10                 | 141.92 ± 70.03        |
|                          | Change          | -23.38 ± 78.83                  | 31.55 ± 60.24                   | 0.28 ± 139.85                   | 17.23 ± 67.81         |
| EPO (mg/dL)              | Baseline        | 13.65 ± 9.42                    | 13.58 ± 7.70                    | 10.69 ± 4.66                    | 13.49 ± 11.65         |
|                          | Change          | 7.29 ± 14.52                    | 26.07 ± 38.47                   | 32.02 ± 54.18                   | 1.32 ± 9.31           |
| Hepcidin (ng/dL)         | Baseline        | 88.17 ± 87.51                   | 139.09 ± 116.72                 | 93.81 ± 95.87                   | 104.38 ± 97.21        |
|                          | Change          | -60.39 ± 80.45                  | -107.92 ± 106.70                | -77.59 ± 92.64                  | -37.67 ± 78.67        |

CRP, C-reactive protein; EPO, erythropoietin; LDL, Low-density lipoprotein; N, number of patients; PP, per-protocol; SD, standard deviation TIBC, total iron binding capacity; TG, triglyceride. Data are presented in mean ± SD.

## Outcomes of Desidustat Treatment in people with Anemia and Chronic Kidney Disease: A Phase 2 Study

**Supplemental Table 7: Pharmacokinetic parameters after first and last dose**

| PK Parameters                              | Desidustat 100 mg<br>(N = 11) | Desidustat 150 mg<br>(N = 11) | Desidustat 200 mg<br>(N = 11) |
|--------------------------------------------|-------------------------------|-------------------------------|-------------------------------|
| <b>Single dose</b>                         |                               |                               |                               |
| T <sub>max</sub> (hr)*                     | 2.00 (1.30 – 6.00)            | 2.00 (1.97 – 10.00)           | 2.01 (1.97 – 5.98)            |
| C <sub>max</sub> (ng/mL)                   | 10968.46 ± 4482.80            | 12476.46 ± 6147.36            | 19614.86 ± 7808.68            |
| AUC <sub>0-t</sub> <sup>#</sup> (hr*ng/mL) | 96399.10 ± 33703.69           | 126389.41 ± 36419.38          | 176668.05 ± 75934.02          |
| AUC <sub>0-∞</sub> (hr*ng/mL)              | 163278.33 ± 170449.61         | 153391.44 ± 24421.08          | 202971.49 ± 92013.96          |
| Elimination rate constant<br>(1/hr)        | 0.09 ± 0.04                   | 0.11 ± 0.02                   | 0.10 ± 0.04                   |
| Half-life (hr)                             | 13.79 ± 16.61                 | 6.56 ± 0.97                   | 7.72 ± 2.55                   |
| Volume of distribution (L)                 | 14.39 ± 8.71                  | 9.44 ± 1.44                   | 12.35 ± 4.84                  |
| Clearance (L/hr)                           | 0.96 ± 0.36                   | 1.01 ± 0.16                   | 1.21 ± 0.57                   |
| <b>Multiple dose (steady state)</b>        |                               |                               |                               |
| T <sub>max,ss</sub> (hr)*                  | 2.00 (1.30 – 8.00)            | 2.00 (1.97 – 6.00)            | 2.00 (2.00 – 6.00)            |
| C <sub>max,ss</sub> (ng/mL)                | 9665.98 ± 4375.04             | 12737.08 ± 4153.92            | 17664.95 ± 8108.99            |
| AUC <sub>0-t</sub> (hr*ng/mL)              | 79280.37 ± 38544.25           | 117853.38 ± 34581.51          | 154308.55 ± 72569.01          |
| Elimination rate constant<br>(1/hr)        | 0.09 ± 0.04                   | 0.12 ± 0.03                   | 0.09 ± 0.03                   |
| Half-life (hr)                             | 8.48 ± 3.13                   | 6.20 ± 1.53                   | 8.70 ± 3.69                   |
| Volume of distribution (L)                 | 12.21 ± 3.71                  | 11.00 ± 2.50                  | 13.90 ± 6.00                  |
| Clearance (L/hr)                           | 1.08 ± 0.36                   | 1.29 ± 0.38                   | 1.16 ± 0.39                   |
| C <sub>min</sub> (ng/mL)                   | 198.98 ± 214.89               | 150.07 ± 261.59               | 452.49 ± 516.73               |
| Fluctuation Index                          | 502.94 ± 193.50               | 487.43 ± 158.89               | 497.00 ± 132.73               |
| Accumulation Index (%)                     | 1.03 ± 0.03                   | 1.01 ± 0.01                   | 1.03 ± 0.05                   |

(\*) T<sub>max</sub> and T<sub>max,ss</sub> is presented as Median (Range), (#) t, 24 hrs. PK, pharmacokinetic.

**Outcomes of Desidustat Treatment in people with Anemia and Chronic Kidney Disease:  
A Phase 2 Study**

**Supplemental Table 8: Potassium (mmol/L) levels during treatment duration**

| <b>Visit</b> | <b>Desidustat 100<br/>mg (N=29)</b> | <b>Desidustat 150<br/>mg (N=28)</b> | <b>Desidustat 200<br/>mg (N=29)</b> | <b>Placebo<br/>(N=30)</b> |
|--------------|-------------------------------------|-------------------------------------|-------------------------------------|---------------------------|
| Screening    | 4.78 ± 0.61                         | 4.54 ± 0.74                         | 4.56 ± 0.76                         | 5.04 ± 0.87               |
| Week 2       | 4.72 ± 0.63                         | 4.55 ± 0.70                         | 4.48 ± 0.94                         | 4.82 ± 0.86               |
| Week 6       | 4.71 ± 0.74                         | 4.62 ± 0.75                         | 4.61 ± 0.88                         | 4.80 ± 0.96               |

*Note:* Values given as mean ± standard deviation.

## Outcomes of Desidustat Treatment in people with Anemia and Chronic Kidney Disease: A Phase 2 Study

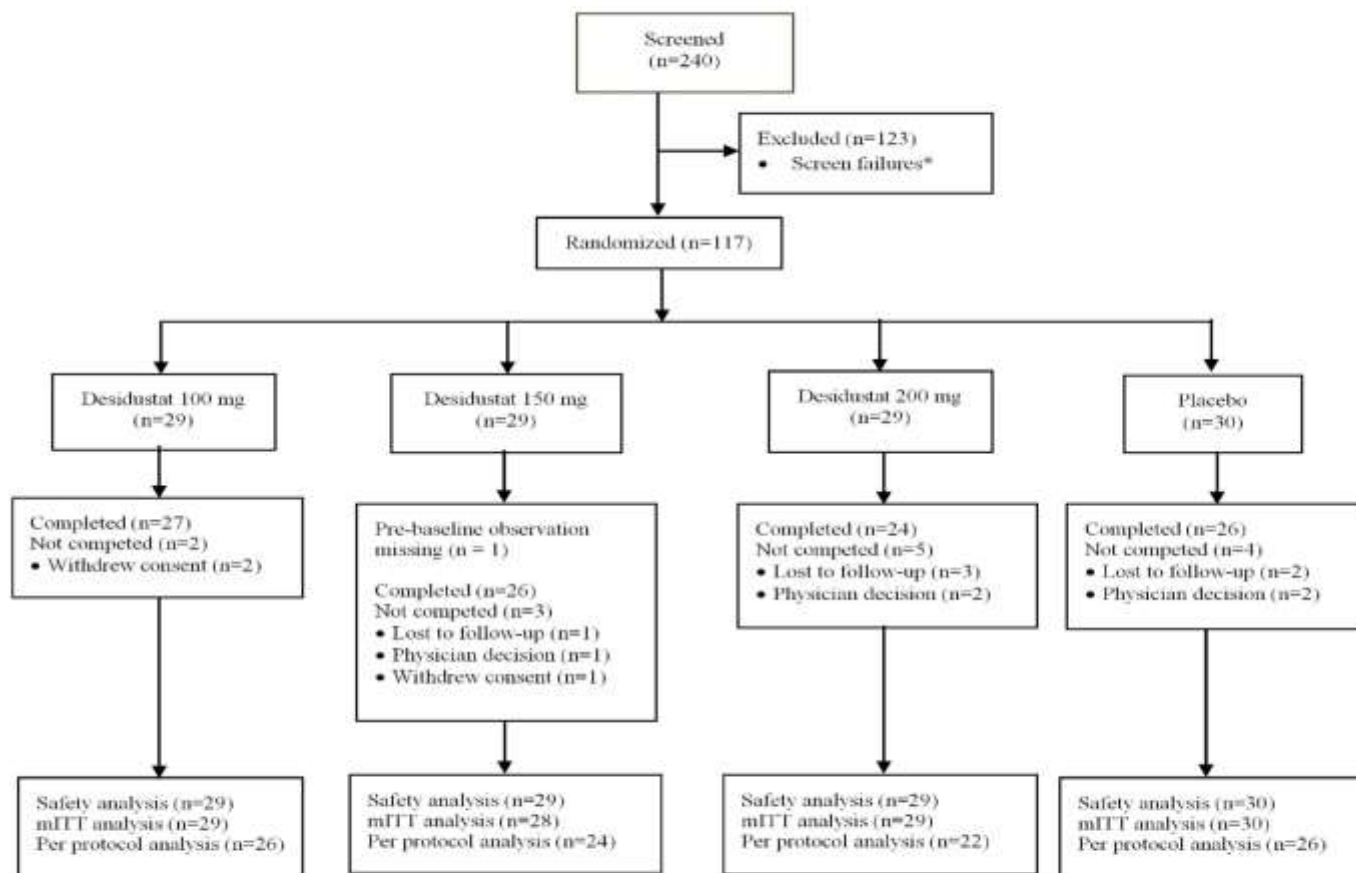

\*eGFR or creatinine out of limit as per eligibility (n = 27); Hb out of limit as per eligibility (n = 15); Low iron, folate or vitamin B12 (n = 4); HbA1c out of limit as per eligibility (n = 13); Significant X-Ray, ECG or ECHO finding (n = 3); Out of limit WBC, platelet, bilirubin, ALT or AST (n = 5); Significant higher EPO value (n = 1); HBsAg, HCV positive (n = 4); Not reported (n = 4); withdrew consent (n = 15); Other reasons (n = 29); Eligible but recruitment completed (n = 3).

Supplementary Figure 1: Patient disposition

**Outcomes of Desidustat Treatment in people with Anemia and Chronic Kidney Disease:  
A Phase 2 Study**

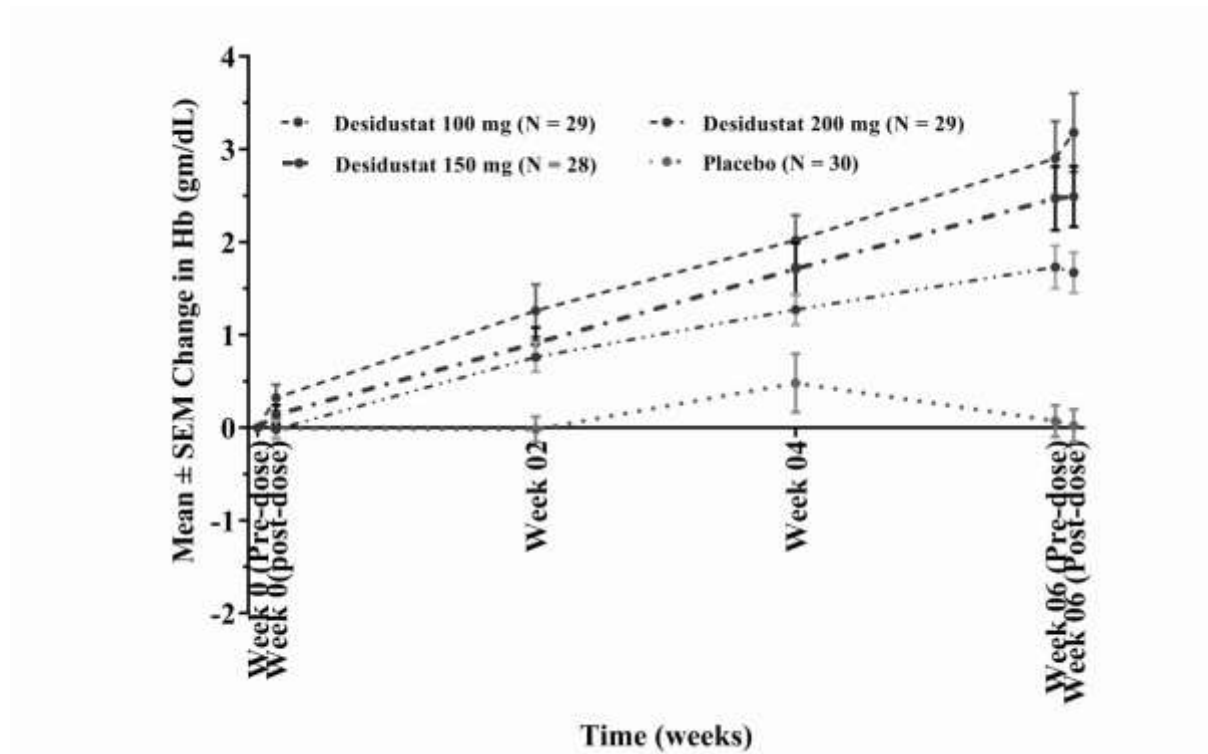

**Supplemental Figure 2: Change in hemoglobin at week 6**

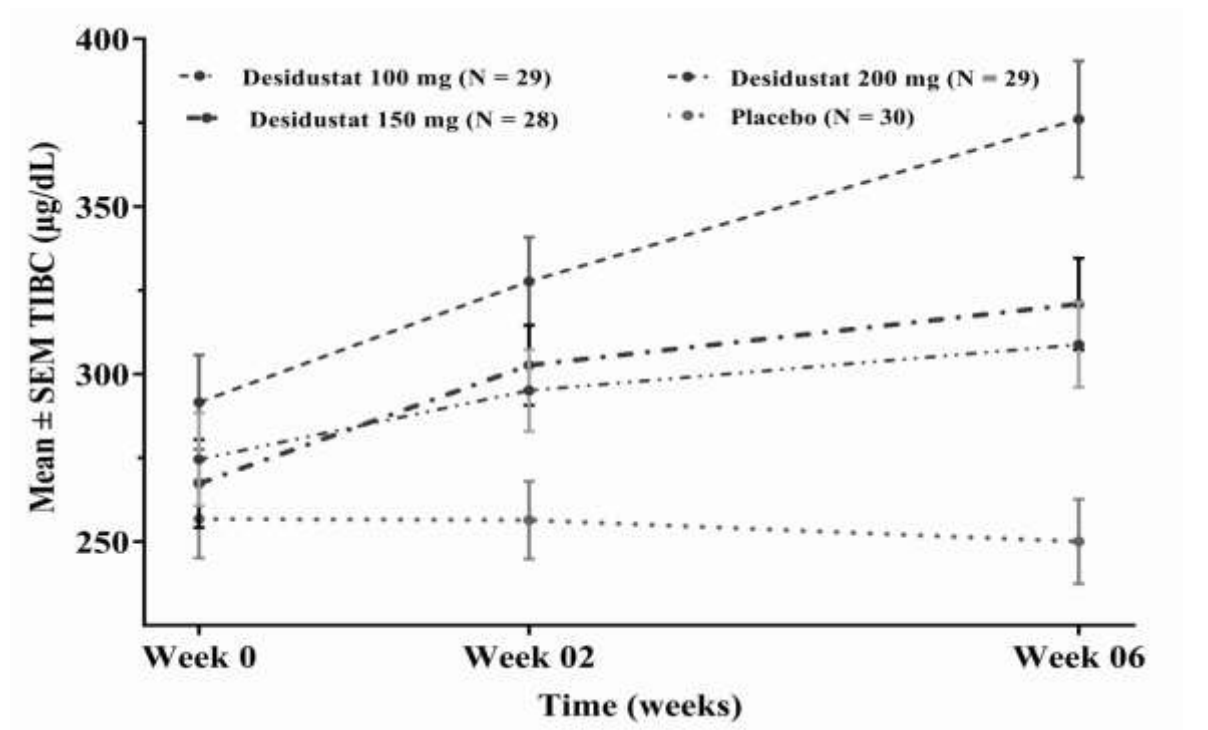

**Supplemental Figure 3a: Change in concentration of TIBC**

**Outcomes of Desidustat Treatment in people with Anemia and Chronic Kidney Disease:  
A Phase 2 Study**

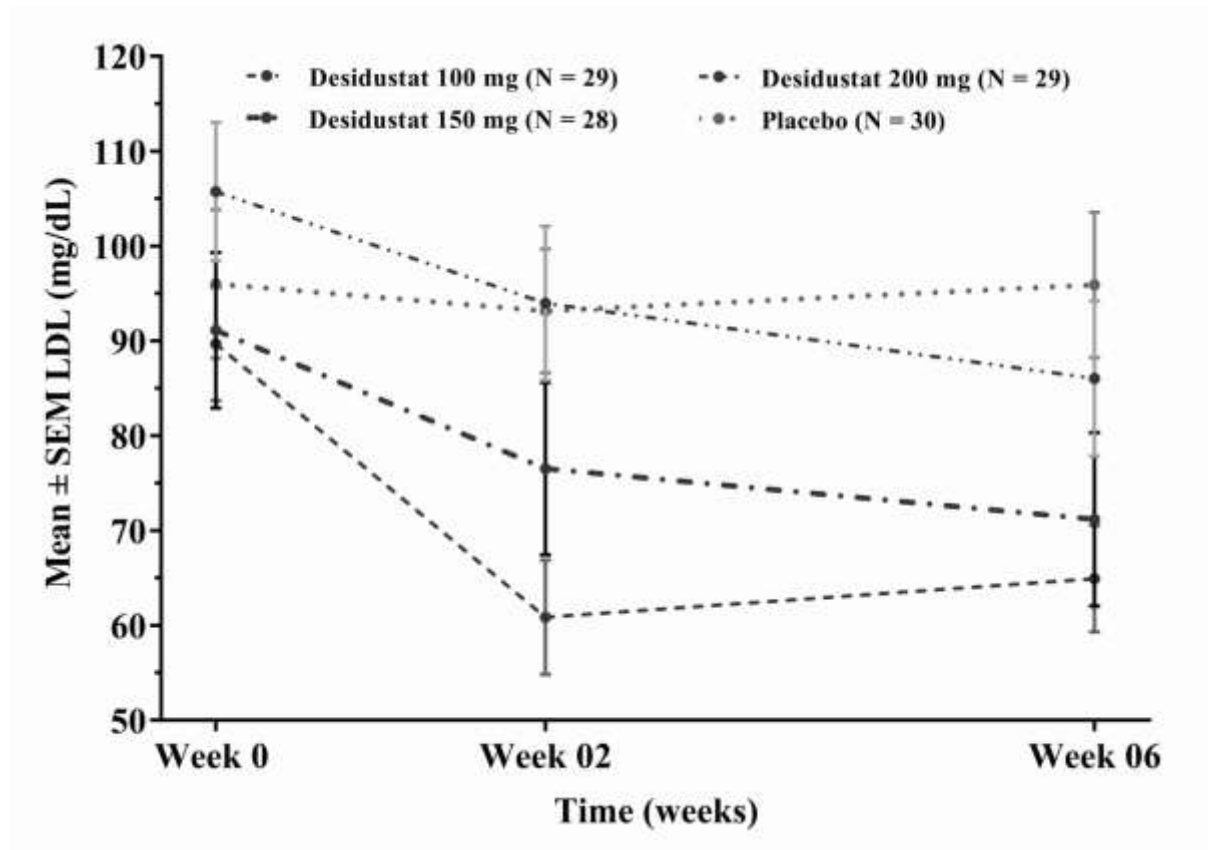

**Supplemental Figure 3b: Change in concentration of LDL**

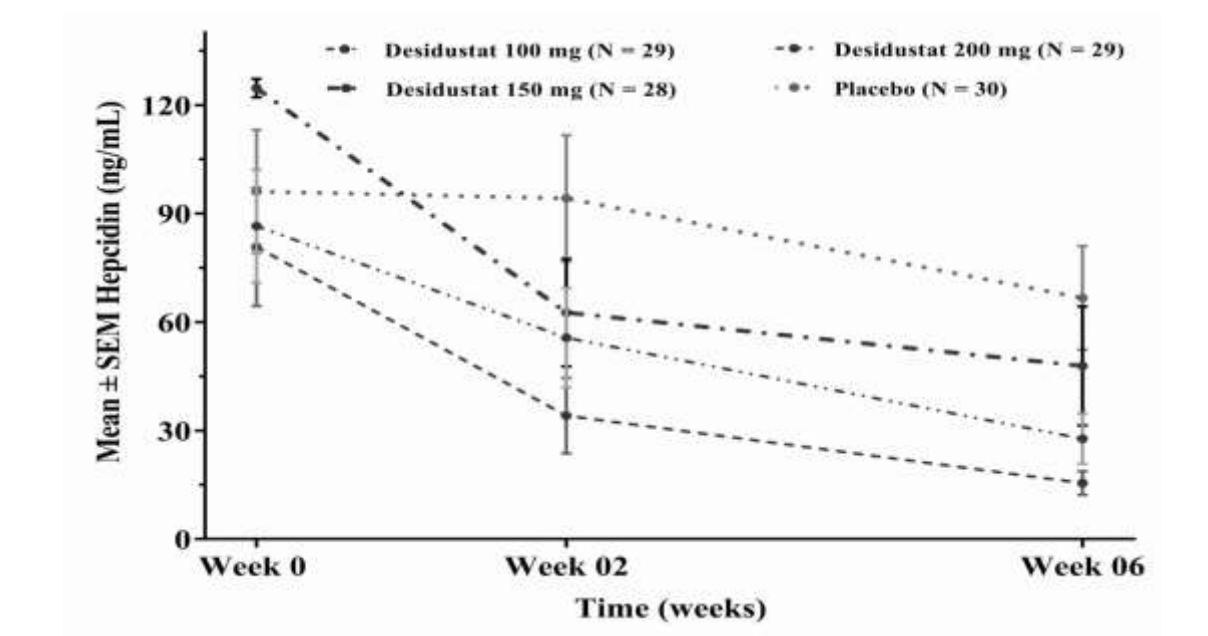

**Supplemental Figure 3c: Change in concentration of hepcidin**

**Outcomes of Desidustat Treatment in people with Anemia and Chronic Kidney Disease:  
A Phase 2 Study**

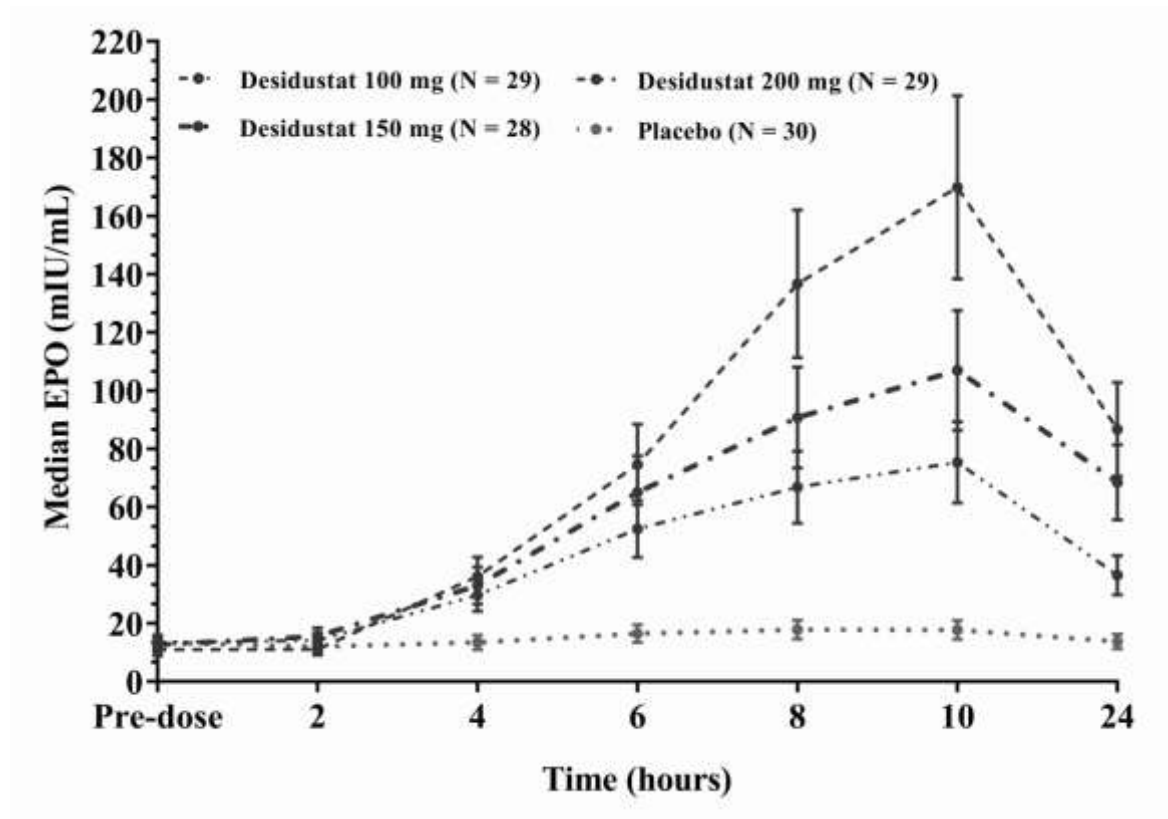

**Supplemental Figure 4a: Erythropoietin levels after first dose at week 0**

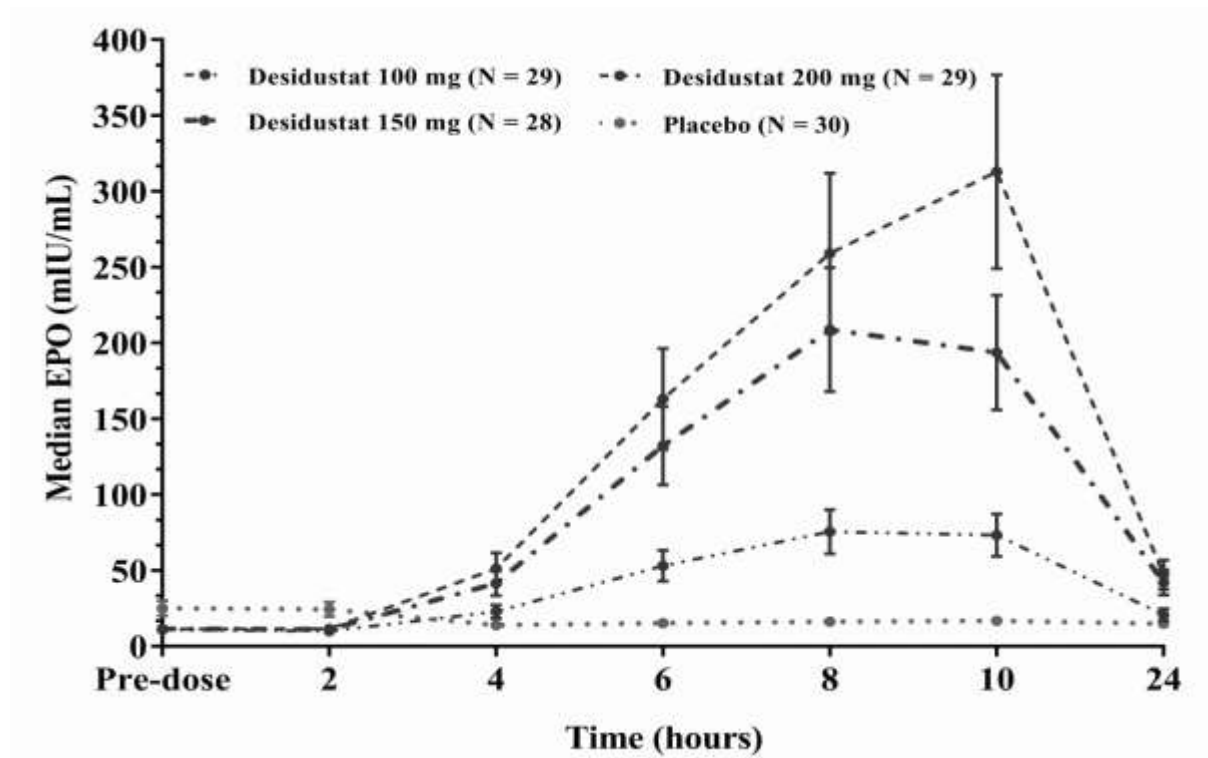

**Supplemental Figure 4b: Erythropoietin levels after last dose at week 6**
